# Supplementary material for: Prevalence of General and Central Obesity and Associated Factors among North Korean Refugees in South Korea by Duration after Defection from North Korea: A Cross-Sectional Study
Source: Int J Environ Res Public Health. 2018 Apr 20;15(4):811. doi: 10.3390/ijerph15040811 (PMC5923853; doi:10.3390/ijerph15040811)
Supplement: Supplementary file 1 [file ijerph-15-00811-s001.pdf]

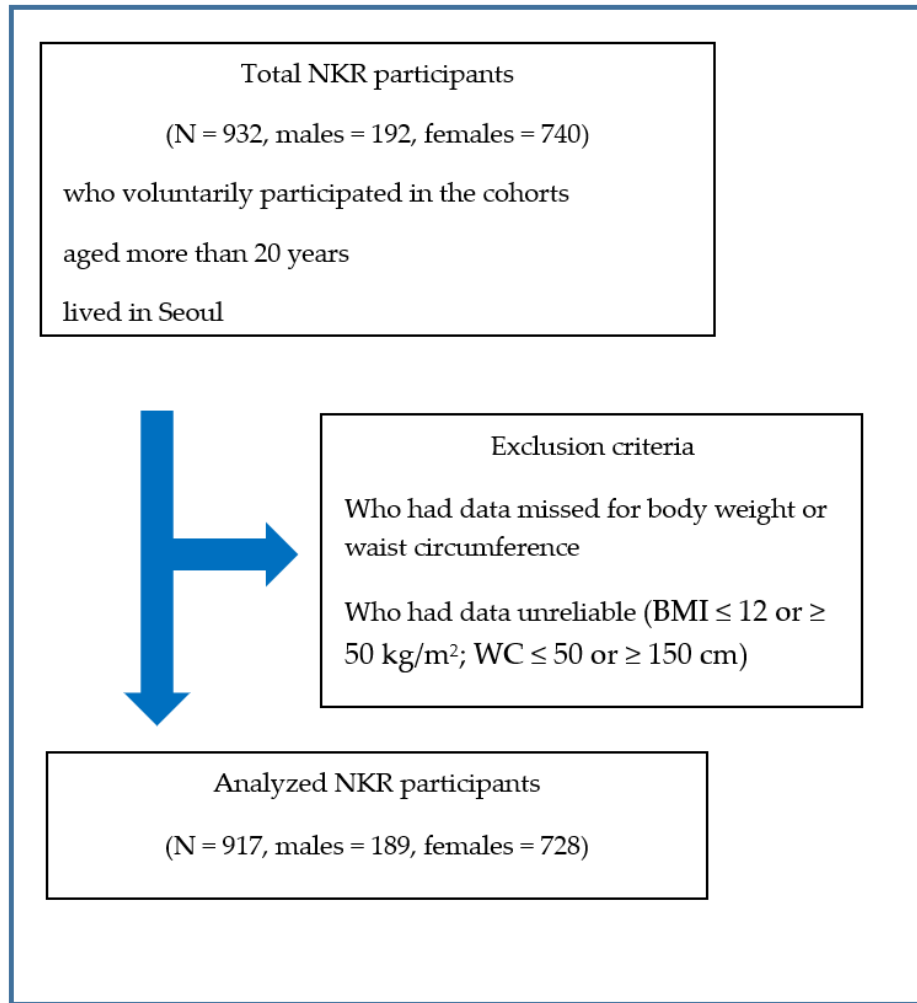

**Figure S1.** Flow diagram of the study. NKR: North Korean refugee.

**Table S1.** Result of logistic regression analysis on central obesity among NKR females.

| Variables                     | Model 1<br>(n = 514) | Model 2<br>(n = 493)  | Model 3<br>(n = 493)  | Model 4<br>(n = 447)  |
|-------------------------------|----------------------|-----------------------|-----------------------|-----------------------|
| Age (years)                   |                      |                       |                       |                       |
| 40–59 vs. 20–39               | 4.68<br>(2.47–8.88)  | 4.58<br>(2.41–8.73)   | 4.47<br>(2.34–8.54)   | 4.13<br>(2.12–8.04)   |
| >60 vs. 20–39                 | 12.45<br>(5.5–28.18) | 12.44<br>(5.43–28.50) | 12.51<br>(5.41–28.90) | 10.24<br>(4.10–25.57) |
| Multiparity<br>(≥ 3 children) | 2.09<br>(1.22–3.59)  | 2.02<br>(1.16–3.52)   | 2.02<br>(1.15–3.52)   | 1.94<br>(1.06–3.56)   |
| Defection period (years)      |                      |                       |                       |                       |
| 5–10 vs. <5                   |                      | 1.06<br>(0.59–1.89)   | 1.00<br>(0.55–1.80)   | 0.99<br>(0.53–1.85)   |
| ≥10 vs. <5                    |                      | 1.12<br>(0.64–1.95)   | 1.10<br>(0.63–1.92)   | 0.97<br>(0.53–1.78)   |
| Current smoking               |                      |                       | 2.31<br>(0.27–19.65)  | 2.22<br>(0.27–18.49)  |
| Frequent alcohol drinking *   |                      |                       | 1.23<br>(0.76–2.00)   | 1.31<br>(0.79–2.20)   |
| Regular exercise †            |                      |                       | 1.16<br>(0.72–1.85)   | 1.19<br>(0.72–1.96)   |

|                 |                     |
|-----------------|---------------------|
| Low income ‡    | 1.88<br>(0.98–3.61) |
| Low education § | 1.17<br>(0.61–2.25) |
| Living alone    | 0.90<br>(0.51–1.56) |

Values are expressed as adjusted odds ratio (95% confidence interval). Model 1: adjusted for sex, age. Model 2: Model 1 + adjusted for duration after defection from North Korea. Model 3: Model 2 + adjusted for health-related lifestyle factors (current smoking, alcohol drinking, exercise). Model 4: Model 3 + adjusted for socioeconomic status (income, education, number of family member) \* Frequent Alcohol drinking: more than one bottle of alcohol per week. † Regular exercise: vigorous activity more than one hour per week. ‡ Low income: monthly income lower than 100,000 Korean won. § Lower education: less than college graduate.

**Table S2.** Mean body weight and BMI in North Korea, transit countries and the day on survey among NKR.

| Variables                | In NK      | Arrival in SK | On Survey in SK |
|--------------------------|------------|---------------|-----------------|
| Body weight (kg)         |            |               |                 |
| Male                     | 60.2 (9.3) | 62.1 (8.7)    | 63.2 (8.8)      |
| Female                   | 51.2 (7.1) | 53.0 (9.2)    | 53.9 (7.4)      |
| BMI (kg/m <sup>2</sup> ) |            |               |                 |
| Male                     | 21.7 (3.0) | 22.4 (3.9)    | 23.0 (2.6)      |
| Female                   | 21.6 (3.0) | 22.3 (3.9)    | 22.7 (2.9)      |

Abbreviations: BMI: body mass index; SK: South Korea; NK: North Korea.
